## **Influence of climatic and environmental risk factors on child diarrhea and enteropathogen infection and predictions under climate change in rural Bangladesh**

Jessica A. Grembi<sup>1</sup>, Anna T. Nguyen<sup>2</sup>, Marie Riviere<sup>2</sup>, Gabriella Barratt Heitmann<sup>2</sup>, Arusha Patil<sup>2</sup>, Tejas S. Athni<sup>2</sup>, Stephanie Djajadi<sup>3</sup>, Ayse Ercumen<sup>4</sup>, Audrie Lin<sup>3</sup>, Yoshika Crider<sup>5</sup>, Andrew Mertens<sup>3</sup>, John M. Colford, Jr.<sup>3</sup>, Benjamin F. Arnold<sup>6</sup>, Md Abdul Karim<sup>7</sup>, Md Ohedul Islam<sup>7</sup>, Rana Miah<sup>7</sup>, Syeda L. Famida<sup>7</sup>, Md Saheen Hossen<sup>7</sup>, Palash Mutsuddi<sup>7</sup>, Shahjahan Ali<sup>7</sup>, Md Ziaur Rahman<sup>7</sup>, Zahir Hussain<sup>7</sup>, Abul K. Shoab<sup>7</sup>, Rashidul Haque<sup>7</sup>, Mahbubur Rahman<sup>7</sup>, Leanne Unicomb<sup>7</sup>, Stephen P. Luby<sup>1</sup>, Adam Bennett<sup>8</sup>, Jade Benjamin-Chung<sup>2,9</sup>

1. Division of Infectious Diseases and Geographic Medicine, Department of Medicine, School of Medicine, Stanford University, Stanford, CA, USA
2. Department of Epidemiology and Population Health, School of Medicine, Stanford University, Stanford, CA, USA
3. Division of Epidemiology, School of Public Health, University of California, Berkeley, Berkeley, CA, USA
4. Department of Forestry and Environmental Resources, NC State University, Raleigh, NC, USA
5. King Center on Global Development, Stanford University, Stanford, California, USA
6. Francis I. Proctor Foundation and Department of Ophthalmology, University of California, San Francisco, San Francisco, CA, USA
7. Infectious Disease Division, International Centre for Diarrhoeal Disease Research, Bangladesh, Dhaka, Bangladesh
8. Malaria Elimination Initiative, Global Health Group, University of California San Francisco, San Francisco, CA, USA
9. Chan Zuckerberg Biohub, San Francisco, CA, USA

## Abstract

### Background

Understanding pathogen-specific relationships with climate is crucial to informing interventions under climate change.

### Methods

We matched spatiotemporal temperature, precipitation, surface water, and humidity data to data from a trial in rural Bangladesh that measured diarrhea and enteropathogen prevalence in children 0-2 years from 2012-2016. We fit generalized additive models and estimated percent changes in prevalence using projected precipitation under Shared Socio-Economic pathways describing sustainable development (SSP1), middle of the road (SSP2), and fossil fuel development (SSP5) scenarios.

### Findings

An increase from 15°C to 30°C in weekly average temperature was associated with 5.0% higher diarrhea, 6.4% higher Norovirus, and 13.0% higher STEC prevalence. Above-median precipitation was associated with 1.27-fold (95% CI 0.99, 1.61) higher diarrhea; higher *Cryptosporidium*, tEPEC, ST-EPEC, STEC, *Shigella*, EAEC, *Campylobacter*, *Aeromonas*, and Adenovirus 40/41; and lower aEPEC, *Giardia*, Sapovirus, and Norovirus prevalence. Other associations were weak or null. Compared to the study period, diarrhea prevalence was similar under SSP1 (7%), 3.4% (2.7%, 4.3%) higher under SSP2, and 5.7% (4.4%, 7.0%) higher under SSP5. Prevalence of pathogens responsible for a large share of moderate-to-severe diarrhea in this setting (*Shigella*, *Aeromonas*) were 13-20% higher under SSP2 and SSP5.

### Interpretation

Higher temperatures and precipitation were associated with higher prevalence of diarrhea and multiple enteropathogens; higher precipitation was associated with lower prevalence of some enteric viruses. Under likely climate change scenarios, we projected increased prevalence of diarrhea and enteropathogens responsible for clinical illness. Our findings inform pathogen-specific adaptation and mitigation strategies and priorities for vaccine development.

### Funding

Bill & Melinda Gates Foundation, National Institute of Allergy and Infectious Diseases, National Heart, Lung, and Blood Institute, Stanford University School of Medicine, Chan Zuckerberg Biohub

## 1 **Research in Context**

### 2 **Evidence before this study**

3 We searched Google Scholar and Scopus for studies published from January 1, 2000 to present  
4 using the following three queries: 1) child; and diarrhea OR “enteric infection”; and  
5 meteorological OR environmental OR “surface water” OR “standing water”; and risk AND/OR  
6 factors; 2) Climate AND change AND project\* AND diarrhea OR diarrhoea; 3) climate AND  
7 change AND project\* OR model AND enter\* AND infect\* AND *E. coli*. Studies generally focused  
8 on individual risk factors for diarrhea transmission or enteric infection, with an emphasis on  
9 temperature and precipitation. Studies found that higher temperatures were associated with  
10 higher incidence of bacterial diarrhea and lower incidence of viral diarrhea; few studies have  
11 investigated associations between temperature and parasitic diarrhea. Heavy rainfall,  
12 particularly after dry periods, was associated with higher diarrhea prevalence, though heavy  
13 rainfall during rainy seasons was found to protect against diarrhea incidence. Similarly, flooding  
14 of surface water and shallow wells was also associated with higher diarrhea prevalence. Very  
15 few studies investigated associations between diarrhea or enteropathogen carriage and surface  
16 water presence, or humidity. A recent individual participant meta-analysis of studies in 19 low-  
17 and middle-income countries found that higher precipitation was associated with a small  
18 decrease in enterotoxigenic *E. coli* (ETEC) and *Campylobacter* spp. prevalence and no difference  
19 in *Shigella*, *Cryptosporidium*, or *Giardia*, or enteric virus prevalence. Weekly average  
20 temperature increases of 10-40° C within the study period were associated with higher risk of  
21 *Campylobacter*, ETEC, *Shigella*, *Cryptosporidium*, *Giardia*, and adenovirus, and lower risk of  
22 sapovirus and rotavirus, and generally, associations were stronger. Higher humidity was  
23 associated with higher risk of enteric bacterial infections and lower risk of enteric virus  
24 infection. A small number of studies have projected diarrhea under climate change in low- and  
25 middle-income countries. Studies have estimated a 15-20% increase in global diarrhea risk in  
26 2040-2069 relative to 1961-1990, up to 21% increase in diarrhea incidence in northern India  
27 from 2013 to the 2040s, 3-10% increase in diarrhea cases in the Gaza Strip associated with 1.5°  
28 to 2°C increases in temperature, and an 8% increase in diarrhea burden by 2050 in Nepal. One  
29 study estimated an additional 1,625,073 ETEC diarrhea cases in Bangladesh from 2046-2065

30 due to climate change. No studies estimated changes in the presence of multiple  
31 enteropathogens under possible climate change scenarios.

32

### 33 **Added value of this study**

34 This study matched remote sensing data on precipitation, temperature, surface water, and  
35 humidity to data on diarrhea and enteropathogen carriage in children under 2 years from a trial  
36 in rural Bangladesh. We fit flexible models to investigate potentially non-linear relationships  
37 between each climate and environmental risk factor and each health outcome. In addition, we  
38 predicted the prevalence of each outcome under three possible climate change scenarios. Our  
39 predictions leveraged the spatiotemporal distributions of both climate precipitation projections  
40 and diarrhea and enteropathogen carriage in the trial. To our knowledge, this is the first study  
41 to predict prevalence under climate change scenarios for both diarrhea and multiple  
42 enteropathogens in a rural, low-resource south Asian setting. Our study sheds light on how  
43 climate change may impact diarrhea and enteropathogen carriage in Bangladesh, which is  
44 highly vulnerable to climate change due to its low altitude and seasonal flooding.

45

### 46 **Implications of all the available evidence**

47 We found that both higher temperatures and precipitation were associated with higher  
48 diarrhea prevalence, consistent with prior studies. Compared to prior studies, which have  
49 primarily found associations between diarrhea and heavy rainfall following a dry period, we  
50 found that moderate levels of weekly precipitation were associated with higher diarrhea  
51 prevalence. Relationships between climatic and environmental variables and enteropathogen  
52 carriage varied by taxa, as other studies have found, but for some pathogens and risk factors,  
53 we observed associations in different directions than prior studies. Under middle of the road  
54 and fossil fuel-based development climate change scenarios, we projected increased diarrhea  
55 prevalence and taxa-specific changes in enteropathogen prevalence. Our findings suggest that  
56 climate change may exacerbate diarrhea burden in rural Bangladesh in the absence of  
57 sustainable development and inform prioritization of pathogen-specific mitigation and/or

58 adaptation interventions (e.g., vaccines) for young children in rural, South Asian settings under  
59 climate change.  
60

## 61 **Introduction**

62 Diarrhea was the third leading cause of disability adjusted life years (DALYs) among children  
63 under 10 years in 2019.<sup>1</sup> Among young children, diarrhea can result in long-term impacts on  
64 growth<sup>2</sup> and cognition.<sup>3</sup> Where diarrhea burden is high, asymptomatic enteropathogen carriage  
65 is common<sup>4</sup> and is linked to child growth failure<sup>4</sup> and impaired child cognitive development.<sup>5</sup>

66  
67 Climatic and environmental factors may influence diarrhea and enteropathogen carriage in  
68 diverse ways due to pathogens' differing environmental survival and transport.<sup>6</sup> Prior studies  
69 have found increased diarrhea after heavy rainfall and floods<sup>7,8</sup> and that parasitic and bacterial  
70 diarrhea are more common in the rainy season.<sup>9</sup> Increased temperatures have been associated  
71 with higher incidence of bacterial diarrhea but lower incidence of viral diarrhea.<sup>9</sup> In low- and  
72 middle-income countries (LMICs), higher temperatures have been associated with a decrease in  
73 rotavirus prevalence and small increase in adenovirus prevalence; higher humidity and  
74 temperature have been associated with higher enteric bacteria prevalence and lower virus  
75 prevalence; and associations with precipitation varied by pathogen.<sup>10</sup>

76  
77 A small number of studies have estimated the burden of diarrhea and enteropathogen infection  
78 under climate change.<sup>11-16</sup> The World Health Organization estimated an additional 32,955  
79 diarrhea deaths in children under 15 years in 2050 due to climate change, with the greatest  
80 increases in South Asia and Eastern Africa.<sup>17</sup> Another study projected that diarrhea risk would  
81 increase by 15-20% in the period 2040-2069 relative to risk levels in 1961-1990.<sup>11</sup> Since the  
82 etiology of diarrhea varies by age and geography,<sup>18</sup> understanding pathogen-specific  
83 relationships with climatic variables at present and with climate change can inform adaptation  
84 and mitigation strategies.<sup>8,11,17</sup> Enteropathogens whose burden is most likely to increase under  
85 climate change could be prioritized for vaccine development. However, no studies have  
86 projected the impact of climate change on the prevalence of multiple enteropathogens.

87

88 Our objectives were to identify climatic and environmental risk factors associated with diarrhea  
89 and enteropathogen prevalence in young children in rural Bangladesh and to predict changes in  
90 diarrhea and enteropathogen prevalence under potential climate change scenarios.

91

## 92 **Methods**

### 93 Study design

94 We analyzed data that was collected in a cluster-randomized trial of water, sanitation,  
95 handwashing, and nutrition interventions in rural Gazipur, Mymensingh, Tangail, and  
96 Kishoreganj districts of Bangladesh.<sup>19</sup> From 2012-2013, the trial enrolled a total of 720 village  
97 clusters spanning a geographic area of 12,500 km<sup>2</sup>. The trial enrolled pregnant women and  
98 measured outcomes in their children at enrollment and approximately 1 and 2 years later. We  
99 matched climatic and environmental risk factors from remote sensing datasets to trial data by  
100 date of outcome measurements and geocoordinates of study compounds (groups of  
101 households in which patrilineal families share a common courtyard). Our pre-analysis plan is  
102 available at <https://osf.io/f9cza/>, and we note deviations from it in Appendix 1.

103

### 104 Outcomes

105 Field workers measured caregiver-reported diarrhea (three or more loose or watery stools in a  
106 24-hour period or a single stool with blood) in children 6 months - 5.5 years old (N=4,478  
107 children). Diarrhea prevalence was measured in three rounds (2012-3, 2013-4, 2014-5). Field  
108 workers collected stool samples from a subsample of children aged 14 months in 2014  
109 (N=1,645 children) (details in Appendix 2) and detected a panel of 34 enteric viruses, bacteria  
110 and parasites in stool using qPCR (N=1,408 children's samples) (details in Appendix 3).

111

112 We measured the following pre-specified primary outcomes: prevalence of 1) caregiver-  
113 reported diarrhea in the past 7 days, 2) any enteric virus (adenovirus 40/41, astrovirus,  
114 norovirus GI/GII, rotavirus, sapovirus), and 3) any parasite (*Cryptosporidium* spp,  
115 *Enterocytozoon bieneusi*, or *Giardia* spp). We did not include prevalence of any bacteria  
116 because at least one bacterium was detected in over 95% of samples. Pathogen-specific

117 prevalence for pathogens detected in >10% of samples were secondary outcomes. To detect  
118 potential misclassification of diarrhea, we included caregiver-reported child bruising in the past  
119 7 days as a negative control outcome.

120

#### 121 Climatic and environmental variables

122 Here we briefly summarize each variable; Appendix 4 includes additional details.

123

124 *Temperature.* Using 1 km resolution daily temperature data from the National Aeronautics and  
125 Space Administration (NASA),<sup>20</sup> we calculated the average, minimum and maximum  
126 temperature values for 7 or 30 days prior to observation with 1-3 week lags for diarrhea and 0-  
127 3 week lags for pathogen outcomes.

128

129 *Precipitation.* We obtained 0.5 degree resolution precipitation data from the National Oceanic  
130 and Atmospheric Administration.<sup>21</sup> We created an indicator for heavy rainfall (any day in the  
131 prior week with total daily precipitation > 80<sup>th</sup> percentile on rainy days during the study period)  
132 and an indicator for whether the weekly sum of precipitation was above or below the median.  
133 We included 1-3-week lags for diarrhea and 0-3-week lags for pathogen outcomes.

134

135 *Surface water.* We obtained 30 m resolution surface water data for the period 1984-2020 from  
136 the Global Surface Water Explorer.<sup>22</sup> Variables included: 1) seasonal surface water consistently  
137 present in a season, 2) ephemeral surface water present intermittently, and 3) any surface  
138 water (ephemeral, seasonal, or permanent). We calculated tertiles of distance from each  
139 household to the nearest surface water and created an indicator for whether the proportion of  
140 pixels with surface water within 250m, 500m, or 750m of each household was above or below  
141 the median.

142

143 *Humidity.* We obtained mean monthly vapor pressure deficit data with 4 km resolution from  
144 Terraclimate<sup>23</sup> and measured associations with a continuous measure in kilopascals (kPA).

145



146 Statistical analysis

147 We restricted diarrhea analyses to the control arms of the original trial (N=7,320  
148 measurements) because a companion analysis found that intervention effects on diarrhea were  
149 modified by climate and environment.<sup>24</sup> For pathogen carriage outcomes, we pooled across all  
150 study arms in which specimens were collected (N=1,408 measurements) and included study  
151 arm as a covariate.

152

153 We used generalized additive mixed models to estimate the relationship between continuous  
154 exposures (modeled with cubic splines) and outcomes. We adjusted for covariates that were  
155 associated with each outcome in our dataset using a likelihood ratio test (p-value < 0.1) (details  
156 in Appendix 5). Because pair-wise correlations between climatic exposures were not strong  
157 (Figure A1), we did not adjust individual exposure models for other climatic exposures. To  
158 assess potential spatial autocorrelation, we used Moran's I coefficient and included a  
159 bidimensional thin plate spline function of household latitude and longitude for models in  
160 which we detected spatial autocorrelation. We included random intercepts for study compound  
161 for diarrhea models to account for multiple measurements per child and per compound and  
162 random intercepts for study cluster for pathogen outcomes to account for village-level  
163 clustering. To estimate simultaneous confidence intervals, we resampled from the variance-  
164 covariance matrix under a multivariate normal distribution.<sup>25</sup>

165

166 We predicted the percentage point change in prevalence under projected precipitation in 2050  
167 using three climate change scenarios: sustainable development reduces CO<sub>2</sub> emissions to net  
168 zero by 2050 (Shared Socioeconomic Pathways 1 (SSP1)); current socioeconomic trends remain  
169 similar and progress towards sustainability is slow, and CO<sub>2</sub> emissions remain the same in 2050  
170 (SSP2); and fossil fuel-based development dominates and CO<sub>2</sub> emissions double by 2050  
171 (SSP5).<sup>26</sup> We matched precipitation projections for 2050 from the Coupled Model  
172 Intercomparison Project Phase 6 data from the NASA Center for Climate Simulation to study  
173 household location and measurement week. We calculated mean weekly precipitation using 0-  
174 3 week lags (see details in Appendix 6). Because the generalized additive model spline fits were

175 approximately linear, for computational efficiency, we fit generalized linear models with a  
176 binomial link function between outcomes and the weekly sum of precipitation then used  
177 parametric g-computation to calculate percent changes in predicted prevalence under each SSP  
178 scenario vs. the study period. We used a bootstrap with 1,000 replicates, resampling by study  
179 clusters for pathogen outcomes and by study compounds for the diarrhea analysis. Our primary  
180 analysis used precipitation lag periods that best aligned with the incubation period for each  
181 outcome (Appendix 7) and repeated analyses with alternative lag periods. We assumed that the  
182 association between precipitation and each outcome will remain constant over time.

183

184 We assessed effect modification for each outcome by child age (<1.5 vs. ≥1.5 years) for  
185 diarrhea outcomes. For precipitation analyses, we assessed effect modification by temperature.

186

#### 187 Role of the funding source

188 The funders of the study had no role in study design, data analysis, interpretation, writing of  
189 the manuscript, or the decision to submit the manuscript for publication.

190

## 191 **Results**

### 192 Study participant characteristics

193 The diarrhea cohort included 4,478 children (mean age = 23 months; SD = 12) measured in  
194 three rounds from 2012-2016, and the pathogen cohort included 1,408 children (mean age = 14  
195 months; SD = 2) measured primarily in 2014 (Table 1). Other demographic characteristics of  
196 each cohort have previously been reported.<sup>19,27</sup>

197

### 198 Temporal trends

199 The study period spanned three rainy seasons from 2013-2015. During the rainy season,  
200 average weekly temperature was higher (Figure 1). Distance to surface water was slightly lower  
201 during the peak of each rainy season. Diarrhea measurements were not collected in some  
202 weeks of the 2013-14 rainy seasons.

203

204 Temperature

205 During the study period, the weekly average temperature was 17-32°C, the weekly minimum  
206 temperature was 6-25°C, and the weekly maximum temperature was 22-40°C. Diarrhea  
207 prevalence was 2.8% (95% CI 1.0%, 7.6%) at weekly average temperature of 15°C and 7.3%  
208 (95% CI 3.2%, 15.8%) at 30° C using a 3-week lag; there was no association with shorter lags  
209 (Figure 2a). Higher average temperatures were also associated with higher norovirus  
210 prevalence (12.0% (95% CI 6.6%, 20.8%) at 17°C; 18.3% (95% CI 11.9%, 27.0%) at 30°C; 1-week  
211 lag), and higher STEC prevalence (5.2% (95% CI 1.9%, 13.8%) at 18°C; 17.8% (95% CI 9.6%,  
212 30.5%) at 30°C; 1-week lag) (Figure 2b). There was no association with prevalence of other  
213 bacteria (Figure 2c) or parasites (Figure 2d). Overall, results for pathogen prevalence were  
214 similar using alternative lag periods (Figure A2). Diarrhea and pathogen prevalence were not  
215 meaningfully associated with weekly minimum and maximum temperature (Figure A3-5).

216

217 Precipitation

218 Mean total weekly precipitation was 52mm (range: 0-284mm) annually, 13mm (range: 0-  
219 171mm) in the dry season and 91mm (2-307mm) in the wet season. Above-median weekly  
220 precipitation was associated with higher diarrhea prevalence (PR = 1.27; 95% CI 0.99, 1.61;  
221 adjusted PR (aPR) = 1.35, 95% CI 1.10, 1.67) using a 2-week lag, but not using 1- or 3-week lags  
222 (Figure 3a). For parasites, above-median weekly precipitation was associated with higher  
223 *Cryptosporidium* prevalence (e.g., PR = 2.21; 95% CI 1.49, 3.26 for a 3-week lag), but lower  
224 *Giardia* prevalence (e.g., PR = 0.63; 95% CI 0.45, 0.89 for a 2-week lag) (Figure 3b). For viruses,  
225 above-median weekly precipitation was associated with higher prevalence of adenovirus 40/41,  
226 but lower prevalence of sapovirus and norovirus (Figure 3c). For bacteria, above-median weekly  
227 precipitation was associated with higher prevalence of typical enteropathogenic *Escherichia coli*  
228 (tEPEC), enterotoxigenic *Escherichia coli* with heat-stable toxin (ST-EPEC), Shiga toxin-producing  
229 *Escherichia coli* (STEC), *Shigella*/enteroinvasive *Escherichia coli* (*Shigella*/EIEC), *Plesiomonas*,  
230 enteroaggregative *Escherichia coli* (EAEC), *Campylobacter*, and *Aeromonas* and lower  
231 prevalence of atypical enteropathogenic *Escherichia coli* (aEPEC) (Figure 3d). Results varied by  
232 lag period. Heavy rainfall was associated with lower prevalence of diarrhea (PR = 0.72, 95% CI

233 0.54, 0.96; 2-week lag) and *E. bieneusi*, norovirus, and sapovirus, and higher prevalence of  
234 *Aeromonas*, *Campylobacter*, *Shigella*/EIEC, EAEC, and ST-ETEC (Figure A6).

235

#### 236 Surface water

237 The mean distance from study households to the closest surface water was 287m (range: 10-  
238 1818m) for any surface water, 451m (range: 11-2083m) for ephemeral surface water, and 405m  
239 (range: 11-1902m) for seasonal surface water. Compared to households in the highest tertile of  
240 distance to any surface water (> 316m), *Aeromonas* prevalence was lower for those in the  
241 middle tertile (165-316m) (PR=0.53; 95% CI 0.29, 0.96) and in the lowest tertile (<165m)  
242 (PR=0.43; 95% CI 0.23, 0.81) (Figure A7). *Aeromonas* results were similar for ephemeral and  
243 seasonal surface water. Distance to surface water was not associated with other outcomes.

244

245 Around each study household, the median proportion of land that contained any surface water  
246 was 0.4% (range: 0-76%) within 250m, 3% (range: 0-86%) within 500m, and 5% (range: 0-84%)  
247 within 750m. Most outcomes were not associated with the proportion of land that contained  
248 surface water. For certain radii and surface water types, an above-median proportion of surface  
249 water was associated with lower diarrhea, *Aeromonas*, and adenovirus 40/41 prevalence and  
250 higher prevalence of tEPEC and *Shigella*/EIEC; however, most confidence intervals were close to  
251 or spanned the null (Figure A8).

252

#### 253 Vapor pressure deficit

254 Vapor pressure deficit (VPD) ranged from 0.57 to 1.51 kPa during the study period. Higher  
255 values of VPD, corresponding to lower humidity, were associated with small decreases in  
256 *Cryptosporidium* and EAEC (Figure A9). While there were some associations with other  
257 outcomes, precision was low.

258

#### 259 Projected prevalence under climate change

260 During the study period, total annual rainfall was 2,032 mm during the study period and 1,754  
261 mm under SSP1, 3,329 mm under SSP2, and 3,782 mm under SSP5 in 2050 (Table A1). There

262 were 185 rainy days during the study vs. 154 under SSP1, but total precipitation was  
263 approximately 11mm per rainy day in both scenarios. Diarrhea prevalence was 5.7% (95% CI  
264 4.4%, 7.0%) higher under SSP5, 3.4% (95% CI 2.7%, 4.3%) higher under SSP2, and 0.4% lower  
265 under SSP 1 (95% CI 0.2%, 0.9%) (Figure 4). Projected enteropathogen prevalence under SSP1  
266 was similar with prevalence in the study period. Under SSP2, prevalence of enteric bacteria  
267 carriage was up to 33% higher, although a decrease was estimated for aEPEC. We estimated  
268 small increases in the prevalence of *E. bieneusi*, and diarrhea, and up to 13% decreases in the  
269 prevalence of *Giardia*, sapovirus and norovirus. Overall, enteropathogen carriage estimates  
270 were similar for SSP2 and SSP5. Using alternative precipitation lag periods, we generally  
271 observed the largest percent changes with 1-week lags for viruses and 2-week lags for bacteria  
272 (Figures A10-12). For parasites, the direction of estimates varied by lag period.

273

#### 274 Other analyses

275 We did not detect effect modification in any of our pre-specified analyses. Our negative control  
276 analysis using caregiver-reported child bruising found null associations with each risk factor,  
277 suggesting that potential misclassification of the outcome did not substantially influence our  
278 results (Table A2, Figure A13).

279

#### 280 **Discussion**

281 We found that higher weekly average temperatures were associated with higher prevalence of  
282 diarrhea, norovirus, and STEC; above-median weekly precipitation was associated with higher  
283 prevalence of diarrhea, *Cryptosporidium*, adenovirus 40/41, and multiple enteric bacteria and  
284 lower prevalence of *Giardia*, norovirus, and sapovirus. Surface water presence was only  
285 associated with carriage of certain enteric bacteria and parasites and not with diarrhea. Under a  
286 sustainable development climate change scenario (SSP1), we projected no changes in outcome  
287 prevalence. Under middle of the road (SSP2) and fossil fuel-based development scenarios  
288 (SSP5), we projected that prevalence was up to 6% higher for diarrhea, up to 33% higher for  
289 enteric bacteria – including moderately higher *Shigella* and *Aeromonas*, which are responsible

290 for substantial moderate-to-severe diarrhea in this setting<sup>18</sup> – and up to 13% lower for  
291 sapovirus and norovirus.

292

### 293 Precipitation and diarrhea

294 Above-median weekly precipitation with a 2-week lag was associated with up to 35% higher  
295 diarrhea prevalence, but heavy rainfall was associated with lower prevalence of diarrhea. A  
296 prior meta-analysis found both positive and negative associations between precipitation and  
297 diarrhea risk.<sup>28</sup> Generally, heavy rainfall preceded by a dry period has been associated with  
298 higher diarrhea risk, while heavy rainfall preceded by a wet period has been associated with  
299 lower diarrhea risk. This may be because pathogens concentrate during dry periods and then  
300 are flushed into the environment when heavy rainfall occurs (the concentration-dilution  
301 hypothesis).<sup>28</sup> We were not able to investigate associations with heavy rainfall preceded by a  
302 dry vs. wet period because almost all heavy rainfall periods were preceded by rainy days. Taken  
303 together, our findings suggest that in our study setting, even moderately higher precipitation  
304 was associated with meaningful increases in diarrhea.

305

### 306 Precipitation and enteropathogens

307 We found that higher precipitation was associated with a higher prevalence of  
308 *Cryptosporidium*, adenovirus 40/41, *Aeromonas*, *Shigella*/EIEC, *Campylobacter*, EAEC, tEPEC, ST-  
309 ETEC, and STEC and lower prevalence of aEPEC, norovirus, sapovirus, and *Giardia*. A recent  
310 meta-analysis of data from 19 LMICs with tropical climates found that higher precipitation was  
311 associated with a small decrease in ETEC and *Campylobacter* prevalence and no difference in  
312 *Cryptosporidium*, *Shigella*, *Giardia*, or enteric virus prevalence.<sup>10</sup> Our findings may differ due  
313 varying background levels of enteropathogen transmission and water and sanitation (WASH)  
314 infrastructure in our study compared to those in the review. Pathogen prevalence was similar  
315 for viruses, slightly higher for *Campylobacter* and *Cryptosporidium*, and lower for *Giardia* and  
316 *Shigella*/EIEC in our study compared to the prior meta-analysis.

317

### 318 Temperature

319 For temperature, our estimated associations were more modest overall than those from  
320 previous studies. We found that an increase in weekly average temperature from 15 to 30° C  
321 was associated with approximately 5% higher diarrhea prevalence, 6.4% higher norovirus  
322 prevalence, and 13% higher STEC prevalence. One study estimated that a 1° C increase in mean  
323 temperature was associated with relative increases of 7% for diarrhea and bacterial diarrhea  
324 and no association with viral diarrhea.<sup>9</sup> Another estimated that an increase from approximately  
325 10-40° C in weekly average temperature was associated with higher risk of *Campylobacter*,  
326 *ETEC*, *Shigella*, *Cryptosporidium*, *Giardia*, and adenovirus and lower risk of sapovirus and  
327 rotavirus, and generally associations were stronger.<sup>10</sup> Our more modest estimates may reflect  
328 differing background levels of enteropathogen transmission, co-varying environmental  
329 conditions, and WASH infrastructure. Our findings reinforce that relationships between  
330 temperature and enteropathogen carriage are heterogeneous within taxa. While higher water  
331 temperatures may reduce the concentration of some enteropathogens in surface water by  
332 increasing inactivation, bacteria may grow more quickly in higher temperatures,<sup>29</sup> and higher  
333 temperatures could increase pathogen survival on land, in surface water, and in aquifers.<sup>6</sup>

334

### 335 Climate

336 Our estimate that diarrhea prevalence would increase by 5.7% by 2050 under SSP5 (fossil-fuel  
337 based development) is similar to previous estimates of 7% in six geographic regions, 8% in  
338 Nepal, and 3-10% in the Gaza Strip;<sup>11,13,16</sup> diarrhea prevalence in our study site was similar to  
339 that in the Gaza Strip and lower than that in Nepal. Under SSP2 and SSP5, we estimated 13%  
340 higher *Shigella spp./EIEC* and 18-20% higher *Aeromonas* prevalence; these pathogens are  
341 responsible for 64% of moderate-to-severe diarrhea among children 12-24 months and 86%  
342 among children 24-59 months in our setting.<sup>18</sup> Though we projected small decreases in  
343 norovirus and sapovirus burden under SSP2 and SSP5, in prior research, neither were strongly  
344 associated with moderate-to-severe diarrhea in children in Bangladesh.<sup>18</sup> Climate change could  
345 increase or decrease individual enteropathogen prevalence due to the diversity of pathogen  
346 survival and inactivation processes across species.<sup>6</sup>

347

348 For all outcomes, prevalence was similar during the study period and predicted under SSP 1  
349 (sustainable development). This is likely because the mean precipitation per rainy day was  
350 nearly the same during the study vs. under SSP1 even though there were more rainy days  
351 during the study. In settings with differing precipitation distributions under climate change,  
352 diarrhea and enteropathogen prevalence projections may be lower under SSP1.

353

354 A unique strength of our study is that we matched predictions under climate change by  
355 household location and month to capture fine-scale heterogeneity in the relationship between  
356 precipitation and each outcome. Prior studies have used single measures of association  
357 between temperature and diarrhea risk,<sup>11,14,15,17</sup> but associations likely vary across settings.  
358 Further, our study captured intra-annual heterogeneity in precipitation projections under  
359 climate change, while most previous studies used annual measures (e.g., mean annual  
360 temperature).<sup>11,13–15,17</sup>

361

### 362 Limitations

363 This study was subject to several limitations. First, in 2014, the original trial did not collect data  
364 during peak rainy season (Figure 1), limiting our ability to make inferences about associations  
365 with heavy rainfall in that season. Second, we only measured enteropathogens in a subsample,  
366 so statistical power was limited for certain analyses; for this reason, we did not consider it  
367 feasible to estimate associations with taxa-specific diarrhea (e.g., bacterial diarrhea) as prior  
368 studies have done. However, measuring enteropathogen carriage (including asymptomatic and  
369 symptomatic infections) sheds light on climate-specific transmission patterns that may not be  
370 discernable when restricting to symptomatic cases. Third, the enteropathogen sample included  
371 a narrow age range (approximately 14 months); results may not generalize to other ages. Our  
372 effect modification analyses may also have had limited statistical power. Finally, relationships  
373 between climate, diarrhea, and enteropathogen infection likely vary by climate zone;<sup>30</sup> our  
374 findings may not hold in settings with differing enteropathogen transmission levels, WASH  
375 infrastructure, and climatic characteristics.

376



377 There are numerous sources of uncertainty in climate change and health prediction models. We  
378 used projected precipitation from a model that best aligned with our study site, but projections  
379 elsewhere could differ substantially. Predictions are sensitive to the estimated association  
380 between climate and diarrhea,<sup>11</sup> which could vary by location and over time. We were not able  
381 to predict prevalence under climate scenarios using temperature because the climate change  
382 projection temperature dataset differed substantially from temperature data during the study.  
383 Further, our 2050 predictions assume similar levels of WASH infrastructure, population density,  
384 and land use as in the study, but we expect these factors to change unpredictably over time.

385

### 386 Conclusions

387 While diarrhea burden has decreased over time, our findings suggest that progress may be  
388 hindered by climate change in the absence of sustainable development. We observed  
389 heterogeneous potential impacts of climate change on enteropathogen carriage by pathogen  
390 taxa and species. Our findings inform prioritization of pathogen-specific interventions (e.g.,  
391 *Shigella* vaccines) for young children in rural, South Asian settings with a similar diarrhea  
392 etiology to mitigate the impacts of climate change.

393

## 394 **Acknowledgments**

395 Research reported in this publication was supported in part by the Bill and Melinda Gates  
396 Foundation (grant number OPPGD759 to the University of California, Berkeley and OPP1161946  
397 to Stanford University) and the National Institute of Allergy and Infectious Diseases of the  
398 National Institutes of Health under Award Numbers K01AI141616 (Jade Benjamin-Chung) and  
399 R01AI166671 (Benjamin F. Arnold). Jade Benjamin-Chung is a Chan Zuckerberg Biohub  
400 Investigator. Anna T. Nguyen was supported by National Heart, Lung, And Blood Institute of the  
401 National Institutes of Health under award number T32HL151323. Jessica A. Grembi was  
402 supported by a Stanford University School of Medicine Dean's Postdoctoral Fellowship. The  
403 content is solely the responsibility of the authors and does not necessarily represent the official  
404 views of the National Institutes of Health. We also acknowledge the Stanford Research  
405 Computing Center for computational resources at the Sherlock high-performance cluster.  
406

## 407 **Role of the Funding Source**

408 The finders of the study had no role in study design, data analysis, interpretation, writing of the  
409 manuscript, or the decision to submit the manuscript for publication.  
410

## 411 **Authors' Contributions**

412 Jessica A. Grembi: conceptualization, data curation, formal analysis, investigation,  
413 methodology, project administration, software, resources, supervision, visualization, writing -  
414 original draft  
415 Anna T. Nguyen: data curation, formal analysis investigation, methodology, software, writing -  
416 review & editing  
417 Marie Riviere, Gabriella Barratt Heitmann, Arusha Patil, Tejas S. Athni: visualization, software,  
418 writing - review & editing  
419 Stephanie Djajadi: data curation, writing - review & editing  
420 Md Abdul Karim, Md Ohedul Islam, Rana Miah, Syeda L. Famida, Md Saheen Hossen, Palash  
421 Mutsuddi: investigation, data curation, resources, writing - review and editing  
422 Shahjahan Ali, Md Ziaur Rahman, Zahir Hussain, Abul K. Shoab: investigation, data curation,  
423 supervision, resources, writing - review and editing  
424 Rashidul Haque, Mahbubur Rahman, Leanne Unicomb, John M. Colford, Jr., Stephen P. Luby,  
425 Ayse Ercumen, Audrie Lin: project administration, supervision, resources, writing - review &  
426 editing  
427 Yoshika Crider, Andrew Mertens: resources, methodology, writing - review & editing  
428 Benjamin F. Arnold: methodology, software, project administration, writing - review & editing  
429 Adam Bennett: methodology, data curation, software, writing - review & editing  
430 Jade Benjamin-Chung: conceptualization, data curation, formal analysis, funding acquisition,  
431 methodology, project administration, resources, supervision, visualization, writing - original  
432 draft  
433

## 434 **Ethics Committee Approval**

435 The trial was approved by human subjects committees at the International Centre for Diarrheal  
436 Disease Research, Bangladesh (icddr,b; PR- 11063), University of California, Berkeley (2011-09-  
437 3652), and Stanford University (25863).

438 **References**

- 439
- 440 1 Vos T, Lim SS, Abbafati C, *et al.* Global burden of 369 diseases and injuries in 204 countries  
441 and territories, 1990–2019: a systematic analysis for the Global Burden of Disease Study  
442 2019. *The Lancet* 2020; **396**: 1204–22.
- 443 2 Richard SA, Black RE, Gilman RH, *et al.* Diarrhea in Early Childhood: Short-term Association  
444 With Weight and Long-term Association With Length. *Am J Epidemiol* 2013; **178**: 1129–38.
- 445 3 Tarleton JL, Haque R, Mondal D, Shu J, Farr BM, Petri WA. Cognitive Effects of Diarrhea,  
446 Malnutrition, and Entamoeba Histolytica Infection on School Age Children in Dhaka,  
447 Bangladesh. *Am J Trop Med Hyg* 2006; **74**: 475–81.
- 448 4 Rogawski ET, Liu J, Platts-Mills JA, *et al.* Use of quantitative molecular diagnostic methods to  
449 investigate the effect of enteropathogen infections on linear growth in children in low-  
450 resource settings: longitudinal analysis of results from the MAL-ED cohort study. *The Lancet*  
451 *Global Health* 2018; **6**: e1319–28.
- 452 5 MAL-ED Network Investigators. Early childhood cognitive development is affected by  
453 interactions among illness, diet, enteropathogens and the home environment: findings from  
454 the MAL-ED birth cohort study. *BMJ Global Health* 2018; **3**: e000752.
- 455 6 Sterk A, Schijven J, de Nijs T, de Roda Husman AM. Direct and Indirect Effects of Climate  
456 Change on the Risk of Infection by Water-Transmitted Pathogens. *Environ Sci Technol* 2013;  
457 **47**: 12648–60.
- 458 7 Mertens A, Balakrishnan K, Ramaswamy P, *et al.* Associations between High Temperature,  
459 Heavy Rainfall, and Diarrhea among Young Children in Rural Tamil Nadu, India: A  
460 Prospective Cohort Study. *Environmental Health Perspectives* 2019; **127**: 047004–047004.
- 461 8 Levy K, Woster AP, Goldstein RS, Carlton EJ. Untangling the Impacts of Climate Change on  
462 Waterborne Diseases: a Systematic Review of Relationships between Diarrheal Diseases and  
463 Temperature, Rainfall, Flooding, and Drought. *Environ Sci Technol* 2016; **50**: 4905–22.
- 464 9 Carlton EJ, Woster AP, DeWitt P, Goldstein RS, Levy K. A systematic review and meta-  
465 analysis of ambient temperature and diarrhoeal diseases. *International Journal of*  
466 *Epidemiology* 2016; **45**: 117–30.
- 467 10 Colston JM, Zaitchik BF, Badr HS, *et al.* Associations Between Eight Earth Observation-  
468 Derived Climate Variables and Enteropathogen Infection: An Independent Participant Data  
469 Meta-Analysis of Surveillance Studies With Broad Spectrum Nucleic Acid Diagnostics.  
470 *GeoHealth* 2022; **6**: e2021GH000452.
- 471 11 Kolstad EW, Johansson KA. Uncertainties Associated with Quantifying Climate Change  
472 Impacts on Human Health: A Case Study for Diarrhea. *Environ Health Perspect* 2011; **119**:  
473 299–305.

- 474 12 McMichael A, Campbell-Lendrum D, Kovats S, *et al.* Global Climate Change. In: Ezzati M,  
475 Lopez A, Rodgers A, Murray C, eds. Comparative Quantification of Health Risks. Geneva:  
476 World Health Organization, 2004. <https://apps.who.int/iris/handle/10665/42770>.
- 477 13 Bhandari D, Bi P, Sherchand JB, Dhimal M, Hanson-Easey S. Assessing the effect of climate  
478 factors on childhood diarrhoea burden in Kathmandu, Nepal. *International Journal of*  
479 *Hygiene and Environmental Health* 2020; **223**: 199–206.
- 480 14 Philipsborn R, Ahmed SM, Brosi BJ, Levy K. Climatic Drivers of Diarrheagenic Escherichia coli  
481 Incidence: A Systematic Review and Meta-analysis. *The Journal of Infectious Diseases* 2016;  
482 **214**: 6–15.
- 483 15 Moors E, Singh T, Siderius C, Balakrishnan S, Mishra A. Climate change and waterborne  
484 diarrhoea in northern India: Impacts and adaptation strategies. *Science of The Total*  
485 *Environment* 2013; **468–469**: S139–51.
- 486 16 Hajat S, Gampe D, Sarsour A, Abuzerr S. Climate Change and Diarrhoeal Disease Burdens in  
487 the Gaza Strip, Palestine: Health Impacts of 1.5 °C and 2 °C Global Warming Scenarios.  
488 *International Journal of Environmental Research and Public Health* 2022; **19**: 4898.
- 489 17 Hales S, Kovats R, Lloyd S, Campbell-Lendrum D. Quantitative risk assessment of the effects  
490 of climate change on selected causes of death, 2030s and 2050s. World Health  
491 Organization, 2014  
492 [https://apps.who.int/iris/bitstream/handle/10665/134014/9789241507691\\_eng.pdf](https://apps.who.int/iris/bitstream/handle/10665/134014/9789241507691_eng.pdf).
- 493 18 Kotloff KL, Nataro JP, Blackwelder WC, *et al.* Burden and aetiology of diarrhoeal disease in  
494 infants and young children in developing countries (the Global Enteric Multicenter Study,  
495 GEMS): a prospective, case-control study. *The Lancet* 2013; **382**: 209–22.
- 496 19 Luby S, Rahman M, Arnold B, *et al.* Effects of water quality, sanitation, handwashing and  
497 nutritional interventions on diarrhoea and child growth in rural Bangladesh: A cluster  
498 randomized trial. *Lancet Global Health* 2018; **6**: e302–15.
- 499 20 Wan Z, Hook S, Hulley G. MOD11A1 MODIS/Terra Land Surface Temperature/Emissivity  
500 Daily L3 Global 1km SIN Grid V006. 2015. DOI:10.5067/MODIS/MOD11A1.006.
- 501 21 Chen M, Shi W, Xie P, *et al.* Assessing objective techniques for gauge-based analyses of  
502 global daily precipitation. *Journal of Geophysical Research: Atmospheres* 2008; **113**.  
503 DOI:<https://doi.org/10.1029/2007JD009132>.
- 504 22 Pekel J-F, Cottam A, Gorelick N, Belward AS. High-resolution mapping of global surface  
505 water and its long-term changes. *Nature* 2016; **540**: 418–22.
- 506 23 Abatzoglou JT, Dobrowski SZ, Parks SA, Hegewisch KC. TerraClimate, a high-resolution global  
507 dataset of monthly climate and climatic water balance from 1958–2015. *Sci Data* 2018; **5**:  
508 170191.

- 509 24 Nguyen A, Grembi JA, Riviere M, *et al.* Influence of climate and environment on the efficacy  
510 of water, sanitation, and handwashing interventions on diarrheal disease in rural  
511 Bangladesh: a re-analysis of a randomized control trial. *Submitted*.
- 512 25 Marra G, Wood SN. Coverage Properties of Confidence Intervals for Generalized Additive  
513 Model Components: Coverage properties of GAM intervals. *Scandinavian Journal of*  
514 *Statistics* 2012; **39**: 53–74.
- 515 26 Riahi K, van Vuuren DP, Kriegler E, *et al.* The Shared Socioeconomic Pathways and their  
516 energy, land use, and greenhouse gas emissions implications: An overview. *Global*  
517 *Environmental Change* 2017; **42**: 153–68.
- 518 27 Grembi JA, Lin A, Karim MA, *et al.* Effect of water, sanitation, handwashing and nutrition  
519 interventions on enteropathogens in children 14 months old: a cluster-randomized  
520 controlled trial in rural Bangladesh. *J Infect Dis* 2020. DOI:10.1093/infdis/jiaa549.
- 521 28 Kraay ANM, Man O, Levy MC, Levy K, Ionides E, Eisenberg JNS. Understanding the Impact of  
522 Rainfall on Diarrhea: Testing the Concentration-Dilution Hypothesis Using a Systematic  
523 Review and Meta-Analysis. *Environmental Health Perspectives* 2020; **128**: 126001.
- 524 29 Hofstra N. Quantifying the impact of climate change on enteric waterborne pathogen  
525 concentrations in surface water. *Current Opinion in Environmental Sustainability* 2011; **3**:  
526 471–9.
- 527 30 Dimitrova A, McElroy S, Levy M, Gershunov A, Benmarhnia T. Precipitation variability and  
528 risk of infectious disease in children under 5 years for 32 countries: a global analysis using  
529 Demographic and Health Survey data. *The Lancet Planetary Health* 2022; **6**: e147–55.
- 530

**Table 1. Study participant characteristics**

|                                           | <b>Diarrhea cohort</b> | <b>Pathogens cohort</b> |
|-------------------------------------------|------------------------|-------------------------|
| Children                                  | 4,478                  | 1,408                   |
| Observations                              | 7,320                  | 1,408                   |
| <b>Year of measurement</b>                |                        |                         |
| 2012                                      | 491 (6.7%)             | 0 (0.0%)                |
| 2013                                      | 2,680 (36.6%)          | 19 (1.3%)               |
| 2014                                      | 1,868 (25.5%)          | 1,389 (98.7%)           |
| 2015                                      | 2,170 (29.6%)          | 0 (0.0%)                |
| 2016                                      | 111 (1.5%)             | 0 (0.0%)                |
| Mean age, months (SD)                     | 22.6 (11.8)            | 14.0 (2.0)              |
| Antibiotics consumed in the past week     | -- <sup>a</sup>        | 233 (16.5%)             |
| <b>Season</b>                             |                        |                         |
| Rainy                                     | 3,408 (46.6%)          | 620 (44.0%)             |
| Dry                                       | 3,912 (53.4%)          | 788 (56.0%)             |
| <b>Intervention arm in original trial</b> |                        |                         |
| Control                                   | 7,320 (100.0%)         | 328 (23.3%)             |
| Water                                     | 0 (0.0%)               | 0 (0.0%)                |
| Sanitation                                | 0 (0.0%)               | 0 (0.0%)                |
| Handwashing                               | 0 (0.0%)               | 0 (0.0%)                |
| WSH                                       | 0 (0.0%)               | 368 (26.1%)             |
| Nutrition                                 | 0 (0.0%)               | 352 (25.0%)             |
| Nutrition + WSH                           | 0 (0.0%)               | 360 (25.6%)             |

<sup>a</sup> Not measured

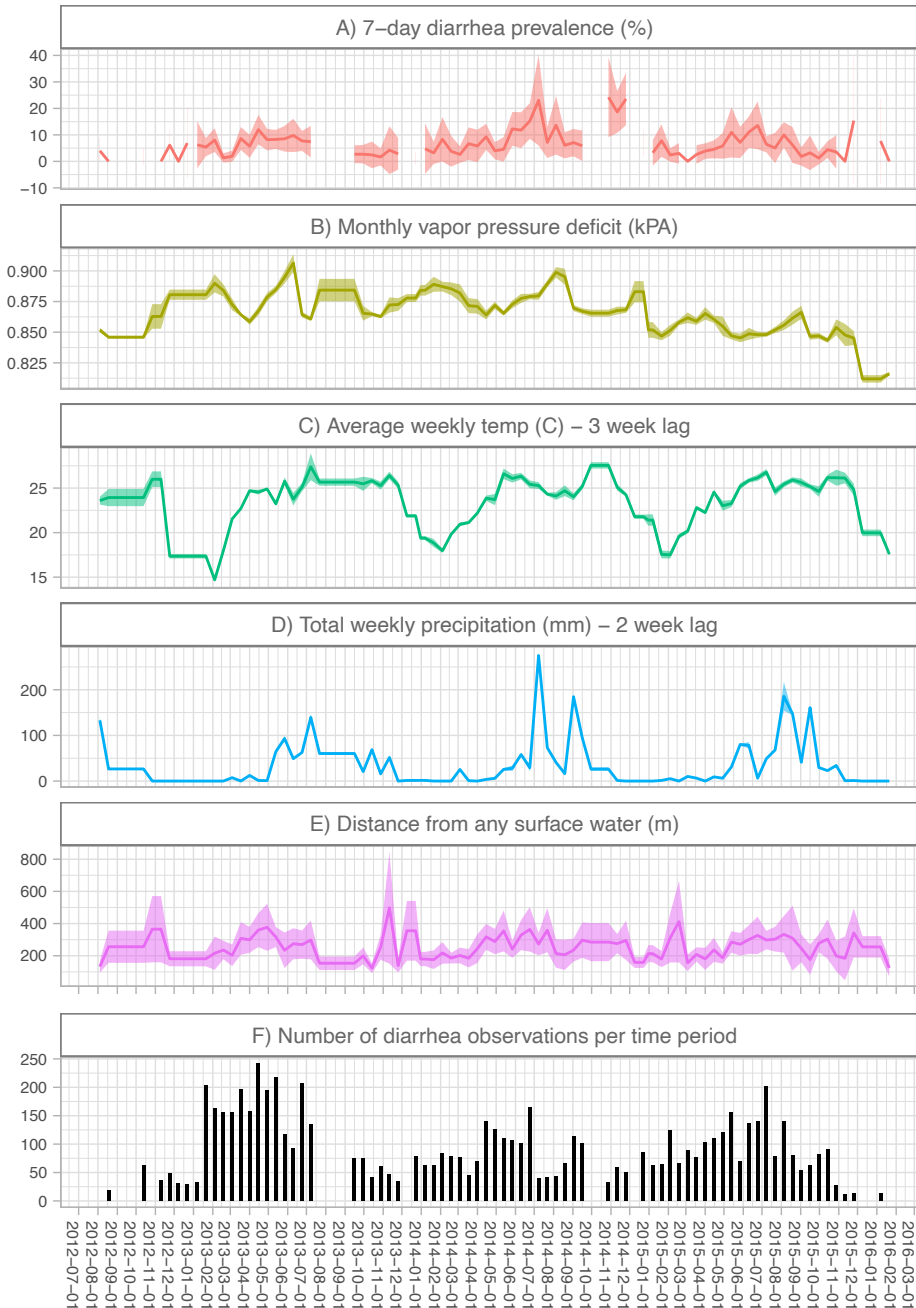

**Figure 1. Time trends in risk factors, diarrhea prevalence, and number of observations**  
Shaded bands indicate 95% confidence intervals using robust sandwich standard errors to account for clustering within study clusters. Estimates excludes biweekly periods when the number of observations was <10. Panel A) includes diarrhea measurements from the control arms of the original trial. Breaks in the line indicate periods when the study did not collect data on diarrhea status. In panels B) to E), we display the risk factor values that corresponded to the diarrhea measurements in our analysis. For periods when there was no diarrhea data collection, we display the risk factor values for the next biweekly period with at least diarrhea measurements. Panel G) displays the number of diarrhea observations in each biweekly period.

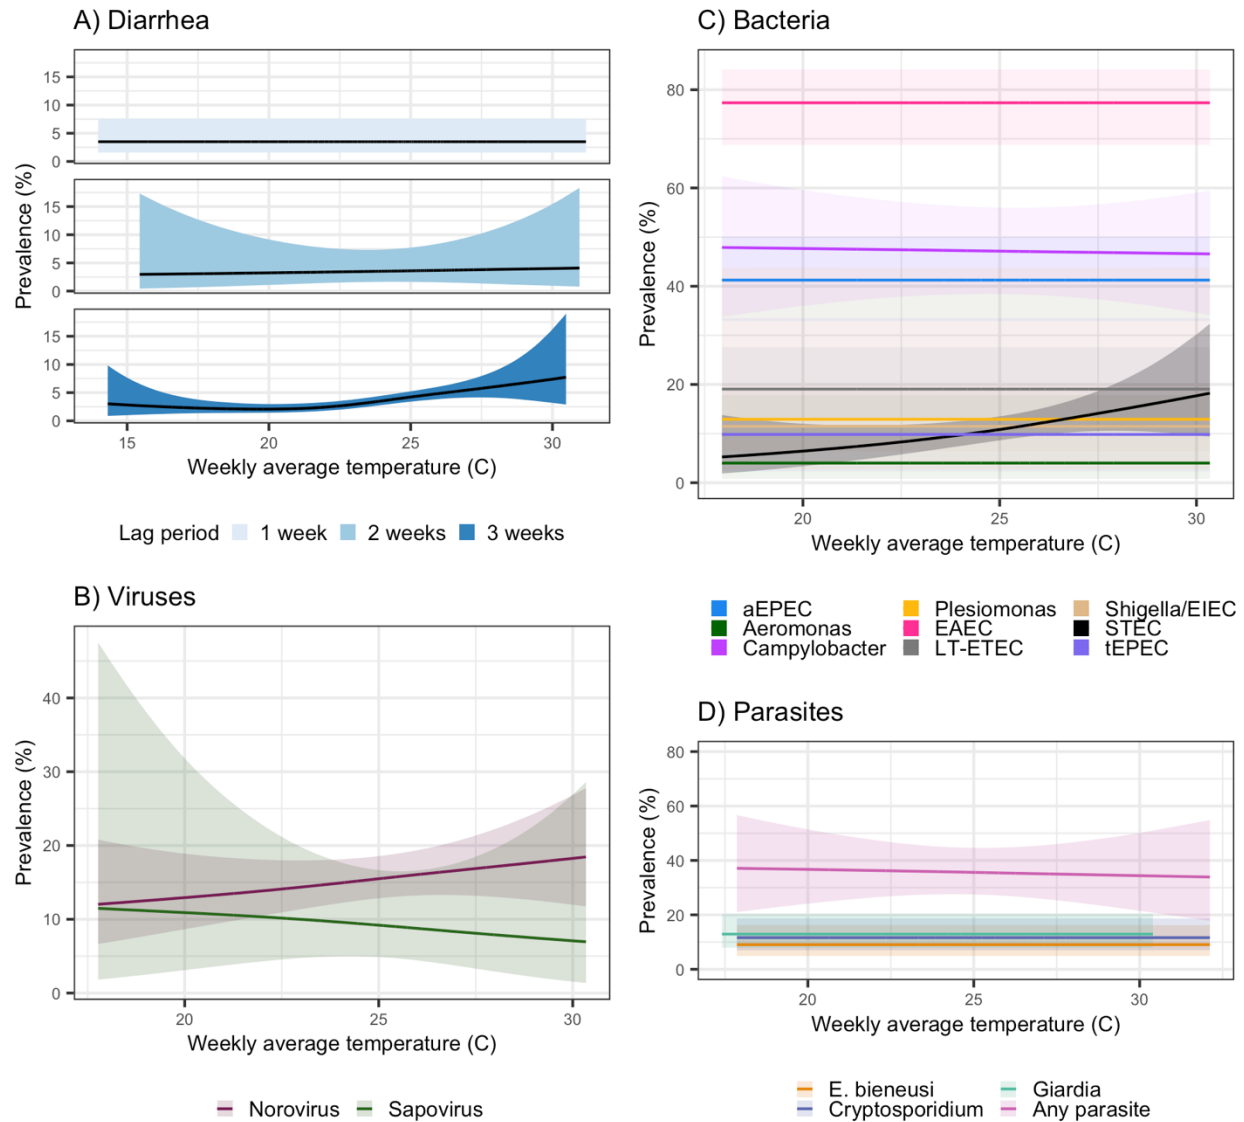

**Figure 2. Diarrhea and enteropathogen prevalence by weekly average temperature**

All panels present unadjusted models; shaded bands indicate simultaneous 95% confidence intervals accounting for clustering. Panel A) includes diarrhea measurements in children aged 6 months - 5.5 years in the control arms in the original trial. Panels B-D) include measurements in children approximately 14 months of age in the control, combined water + sanitation + handwashing (WASH), nutrition, and combined nutrition + WASH arms of the original trial. We present results for the lag periods that best aligned with the incubation period for each outcome (Appendix 7); results with alternative lag periods are in Figure A2. Results not shown for any virus, adenovirus 40/41, or ST-EPEC due to very low precision of model estimates.



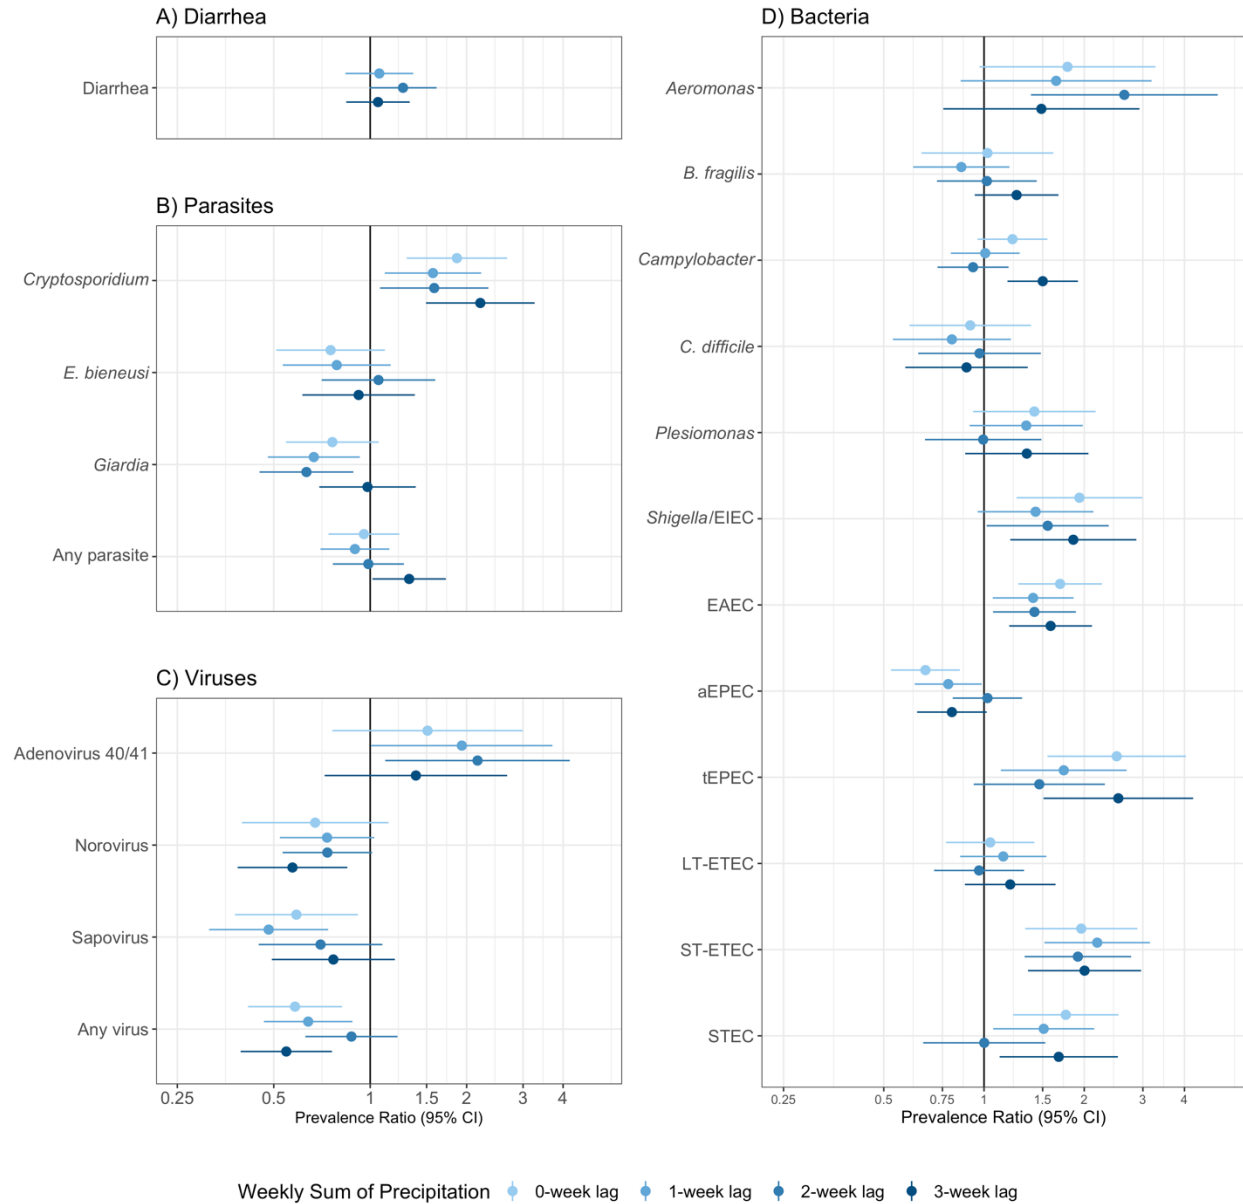

### Figure 3. Diarrhea and enteropathogen prevalence by average weekly precipitation

All panels present unadjusted models including an indicator for above median average weekly precipitation as the independent variable; adjusted models produced similar results. Error bars present 95% confidence intervals adjusted for clustering. Panel A) includes diarrhea measurements in children aged 6 months - 5.5 years in the control arms in the original trial. Panels B-D) include measurements in children approximately 14 months of age in the control, combined water + sanitation + handwashing (WASH), nutrition, and combined nutrition + WASH arms of the original trial.

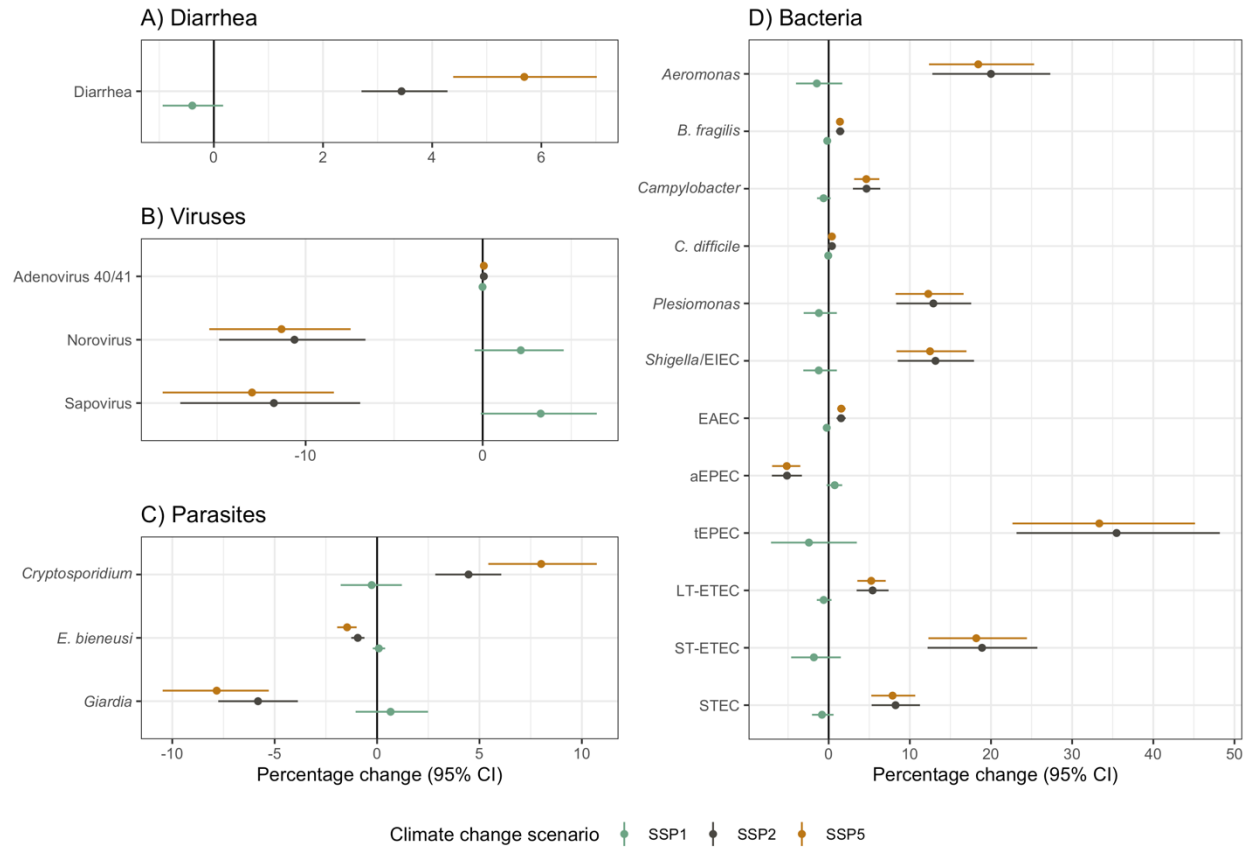

**Figure 4. Percentage change in diarrhea and enteropathogen prevalence under climate change scenarios**

Colors indicate Shared Socioeconomic Pathway scenarios: SSP1: sustainable development (SSP1); middle of the road (SSP2); and fossil fuel-based development (SSP5). Point estimates display relative percentage changes in outcome prevalence in each scenario in 2050 compared to prevalence during the study period. Error bars indicate 95% confidence intervals estimated with a clustered bootstrap with 1,000 replicates. Point estimates with small counterfactual shifts in the precipitation distribution produced narrower confidence intervals. Panel A) includes diarrhea measurements in children aged 6 months - 5.5 years in the control arms in the original trial. Panels B-D) include measurements in children approximately 14 months of age in the control, combined water + sanitation + handwashing (WASH), nutrition, and combined nutrition + WASH arms of the original trial. We present results for the lag periods that best aligned with the incubation period for each outcome (Appendix 7); results with alternative lag periods are in Figures A11-13.
